# Supplementary material for: Comprehensive Analysis of Somatic Reversion Mutations in Homologous Recombination Repair (HRR) Genes in A Large Cohort of Chinese Pan-cancer Patients
Source: PubMed Central journal article supplement (PMC8899361; doi:10.7150/jca.65650), 2022-01-09
Supplement: jcav13p1119s1.pdf [file jcav13p1119s1.pdf]

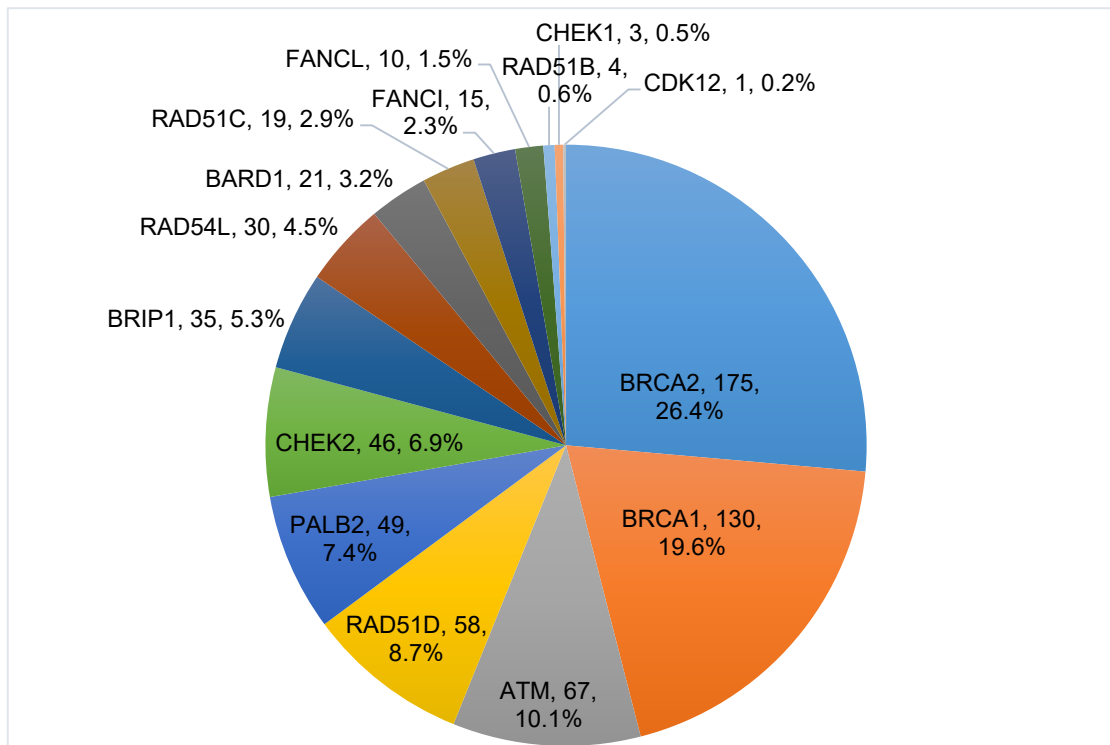

**Supplementary Figure 1.** Prevalence and distribution of P/LP germline mutations among 15 HRR genes.

**Supplementary Table 1.** Clinicopathologic characteristics of patients in the total cohort and some major types in this study.

|               | Overall<br>(n = 23375) | Lung cancer<br>(n = 17029) | Breast cancer<br>(n = 1024) | Ovarian cancer<br>(n = 656) | Pancreatic cancer<br>(n = 269) | Patients with HRR<br>germline mutations<br>(n = 654) |
|---------------|------------------------|----------------------------|-----------------------------|-----------------------------|--------------------------------|------------------------------------------------------|
| <b>Gender</b> |                        |                            |                             |                             |                                |                                                      |
| Female        | 10929 (46.6%)          | 7509 (44.1%)               | 997 (97.4%)                 | 604 (92.1%)                 | 108 (40.1%)                    | 379 (58.0%)                                          |
| Male          | 11490 (49.0%)          | 8905 (52.3%)               | 0 (0.0%)                    | 0 (0.0%)                    | 153 (56.9%)                    | 246 (37.6%)                                          |
| Unknown       | 1046 (4.5%)            | 615 (3.6%)                 | 27 (2.6%)                   | 52 (7.9%)                   | 8 (3.0%)                       | 29 (4.4%)                                            |
| <b>Age</b>    |                        |                            |                             |                             |                                |                                                      |
| Age (Mean±SD) | 59.45±12.16            | 60.97±11.35                | 50.09±10.88                 | 54.52±11.00                 | 60.24±11.35                    | 57.04±12.51                                          |
| <b>Stage</b>  |                        |                            |                             |                             |                                |                                                      |
| I             | 1201 (5.1%)            | 903 (5.3%)                 | 200 (19.5%)                 | 13 (2.0%)                   | 2 (0.7%)                       | 34 (5.2%)                                            |
| II            | 2175 (9.3%)            | 1438 (8.4%)                | 55 (5.4%)                   | 118 (18.0%)                 | 56 (20.8%)                     | 61 (9.3%)                                            |
| III           | 6848 (29.2%)           | 4790 (28.1%)               | 258 (25.2%)                 | 286 (43.6%)                 | 78 (29.0%)                     | 210 (32.1%)                                          |
| IV            | 12511 (53.3%)          | 9478 (55.7%)               | 464 (45.3%)                 | 199 (30.3%)                 | 132 (49.1%)                    | 323 (49.4%)                                          |
| Unknown       | 730 (3.1%)             | 420 (2.5%)                 | 47 (4.6%)                   | 40 (6.1%)                   | 1 (0.4%)                       | 26 (4.0%)                                            |
